# **TITLE** MODULATION OF INTRACELLULAR CALCIUM FLUXES IN OXIDANT-INJURED ENDOTHELIAL CELLS BY HALOTHANE AND ISOFLURANE

**AUTHORS** JR Shayelevitz, M.D., J Varani, Ph.D., PR Knight, M.D., Ph.D.  
**AFFILIATION** Departments of Anesthesiology and Pathology, University of Michigan Medical School, Ann Arbor, MI 48109

Volatile anesthetics increase the sensitivity of rat pulmonary artery endothelial cells (RPAECs) to oxidant-mediated injury.<sup>1,2</sup> This effect is due to an anesthetic-induced alteration in the function of the pulmonary vascular endothelium. We have begun exploring the mechanisms of these alterations by following the time course of changes in intracellular free calcium ( $[Ca^{2+}]_i$ ) in single cells superfused with hydrogen peroxide ( $H_2O_2$ ).

RPAECs isolated as described elsewhere<sup>3</sup> were kindly provided by Dr. Una S. Ryan (University of Miami). The day before the experiment, the cells were seeded onto round coverglasses at a density of  $2-3 \times 10^5$  cells per coverglass and allowed to adhere during an overnight incubation in Minimum Essential Medium supplemented with 10% fetal bovine serum. This density resulted in a monolayer less than 50% confluent.

On the day of the experiment, cells were loaded for 20 min at room temperature with  $12.5 \mu M$  Fura-2 as the acetoxymethyl ester. After the loading buffer was removed, the coverglasses were mounted in a temperature- and atmosphere-controlled chamber on the stage of a Leitz Diavert microscope. The cells were superfused with a Hank's Balanced Salt Solution (HBSS) based buffer at a rate of 30 mL/hr, maintained at a temperature of  $35^\circ C$ . The emission intensity signals from single cells at 515 nm were analyzed after alternating excitation at 340 nm and 380 nm. At the conclusion of each experiment, an *in vitro* calibration of each cell was attempted by first superfusing the cell with  $10 \mu M$  ionomycin in  $1.8 mM$   $Ca^{2+}$  HBSS, followed by  $7 mM$  EGTA in  $Ca^{2+}$ -free HBSS.  $[Ca^{2+}]_i$  was calculated by the method of Grynkiewicz *et al.*, using a dissociation constant of 224.<sup>4</sup>

Each cell was superfused with either  $1.8 mM$  or  $100 nM$   $Ca^{2+}$  HBSS and treated in one of four different ways: with HBSS plus  $750 \mu M$   $H_2O_2$ , with HBSS plus  $H_2O_2$  after equilibration with  $1.7\%$  halothane, with HBSS plus  $750 \mu M$   $H_2O_2$  after

equilibration with  $2.8\%$  isoflurane, or with HBSS alone. Data in each  $Ca^{2+}$  group were analyzed separately using 2-way ANOVA. If the F-ratio for the treatment-time interaction term was significant ( $P < 0.05$ ), multiple comparisons were performed using the Games-Howell test.

In  $1.8 mM$   $Ca^{2+}$  (fig. 1) equilibration with halothane ( $n=7$ ) was associated with a significant rise in  $[Ca^{2+}]_i$  over the 30 min treatment with  $H_2O_2$ , compared with either isoflurane pretreatment ( $n=8$ ), or with cells treated with  $H_2O_2$  alone ( $n=8$ ). In  $100 nM$   $Ca^{2+}$  (fig. 2),  $[Ca^{2+}]_i$  increased in all three groups of injured cells, although isoflurane equilibration was associated with a smaller rise.

Halothane exacerbates the increase in  $[Ca^{2+}]_i$  in RPAECs injured with  $H_2O_2$  in normal  $Ca^{2+}$  buffer. This effect is not seen with isoflurane pretreatment at an equipotent concentration. In  $100 nM$   $Ca^{2+}$  buffer, a significant increase in  $[Ca^{2+}]_i$  is seen in injured cells, which is attenuated in the presence of isoflurane. Early in the course of injury (before 20 min)  $Ca^{2+}$  is mobilized from sequestered internal stores, which process may be inhibited in the presence of isoflurane; however, after 20 min halothane may increase the influx of  $Ca^{2+}$  from the extracellular environment. These effects support the concept of different cellular sites of action for these two volatile anesthetics.

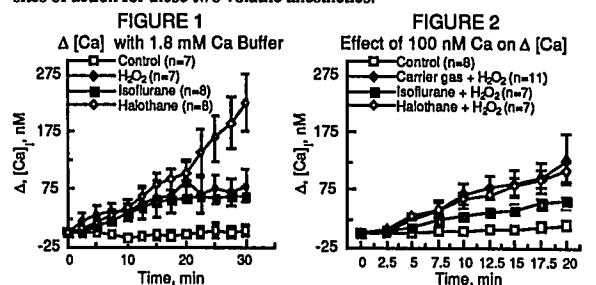

<sup>1</sup> Anesthesiology 71:A212, 1989.

<sup>2</sup> Anesthesiology 71:A213, 1989.

<sup>3</sup> J Tissue Cult Methods 10:9-13, 1986.

<sup>4</sup> J Biological Chem 260:3440-3450, 1985.

## **A342**

# **TITLE:** ETOMIDATE INDUCTION MAINTAINS SYMPATHETIC OUTFLOW IN HUMANS: DIRECT OBSERVATIONS FROM SYMPATHETIC RECORDINGS

**AUTHORS:** T.J. Ebert, M.D., Ph.D., D.D. Kanitz, M.D., R.J. Berens, M.D., J.P. Kampine, M.D., Ph.D.

**AFFILIATION:** Department of Anesthesiology, The Medical College of Wisconsin and VA Medical Center, Milwaukee, WI 53295

Etomidate induction in both healthy and compromised patients has minimal effects on cardiovascular function. However, *in vitro* studies suggest that etomidate has direct negative inotropic effects. One mechanism which might contribute to the observed minimal *in vivo* effects of etomidate may be mediated by compensatory sympathetic reflexes which might over-ride direct inotropic actions. In the present research, recordings of sympathetic outflow directed to skeletal muscle blood vessels (MSNA) were obtained during induction of anesthesia with etomidate ( $0.3 mg/kg$ ) and compared to responses recorded during sodium thiopental induction ( $4-5 mg/kg$ ).

ASA class I patients scheduled for elective surgery signed consent forms approved by the Human Studies Committee and were instrumented with ECG, radial artery catheter and were given  $10 ml/kg$  of IV saline. MSNA was recorded from a 5μ-tipped needle positioned in a sympathetic nerve within a muscle fascicle of the peroneal nerve. Measured parameters (HR,

MAP, MSNA) prior to induction were similar between etomidate and thiopental groups. Moreover, reflex increases in HR and MSNA elicited by a brief hypotensive stimulus ( $100 \mu g$  bolus of nipride) did not differ between groups while awake. Average % changes in parameters which occurred during the 4 minute period after induction and prior to intubation are shown below.

|                                                | % $\Delta$ during induction | sodium thiopental<br>n=7 | etomidate<br>n=6 |
|------------------------------------------------|-----------------------------|--------------------------|------------------|
| % $\Delta$ HR, b/min                           |                             | $24 \pm 5.3$             | $13 \pm 5^*$     |
| % $\Delta$ SBP, mm Hg                          |                             | $-10 \pm 4$              | $5.6 \pm 3.1^*$  |
| % $\Delta$ MSNA, freq/100 cardiac cycles       |                             | $-30 \pm 12$             | $-11 \pm 7^*$    |
| <b>% <math>\Delta</math> baroreceptor gain</b> |                             |                          |                  |
| MSNA , bursts/mm Hg                            |                             | $-75 \pm 13$             | $-13 \pm 14^*$   |
| R-R interval, msec/mm Hg                       |                             | $-62 \pm 12$             | $-16 \pm 17^*$   |

Data are mean %  $\Delta \pm$  SEM, \* =  $p < 0.05$  compared to thiopental

Thus, the maintained blood pressure during etomidate induction is in part due to a minimal reduction in sympathetic outflow and a maintained ability of the baroreceptor reflex to augment MSNA and heart rate.
